# Supplementary material for: Single atom Fe-based catalyst derived from hierarchical (Fe,N)-ZIF-8/CNFs for high-efficient ORR activity
Source: Royal Society of Chemistry journal article supplement (doi:10.1039/d2qm00763k), 2022-01-01
Supplement: d2qm00763k1.pdf [file d2qm00763k1.pdf]

## Supplementary Material

### Single Atom Fe-Based Catalyst Derived from the Hierarchical (Fe,N)-ZIF-8/CNFs for High-Efficient ORR Activity

Wenfang Miao<sup>a</sup>, Feirong Huang<sup>a</sup>, Xiaochen Shen<sup>a</sup>, Shaopeng Li<sup>a</sup>, Xingru Cao<sup>a</sup>, Xuefeng Zhang<sup>b</sup>

,Jieyi Yu<sup>b\*</sup> and Xinglong Dong<sup>a\*</sup>

<sup>a</sup>Key Laboratory of Materials Modification by Laser, Ion and Electron Beams (Ministry of Education), School of Materials Science and Engineering, Dalian University of Technology, Dalian 116024, China.

<sup>b</sup>Institute of Advanced Magnetic Materials, College of Materials and Environmental Engineering, Hangzhou Dianzi University, Hangzhou 110819, China.

\*Corresponding authors.

E-mail addresses: yujieyi@hdu.edu.cn, dongxl@dlut.edu.cn

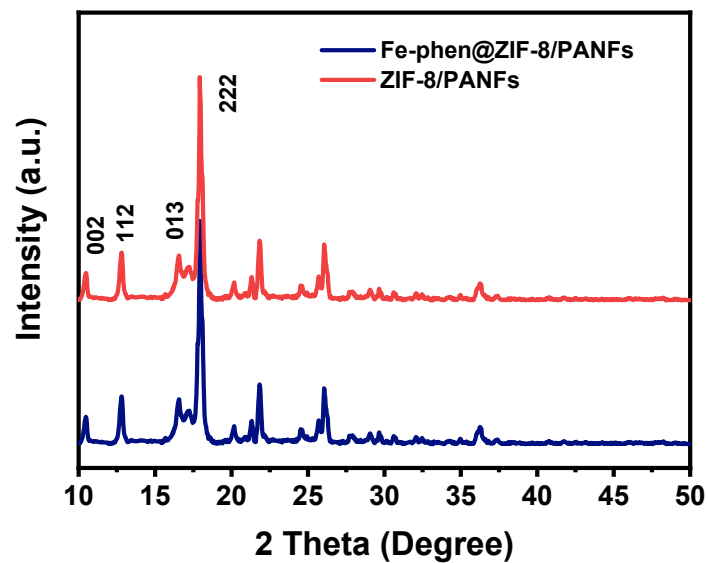

Fig. S1. XRD patterns of ZIF-8/PANFs and Fe-Phen@ZIF-8/PANFs.

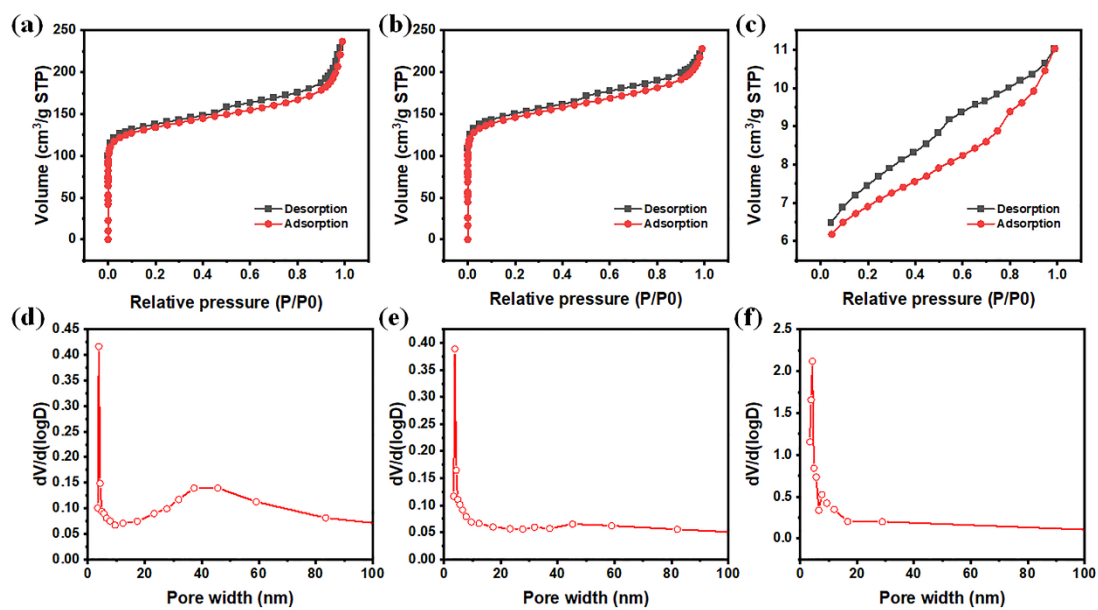

Fig. S2. (a-c)  $N_2$  adsorption-desorption isotherms, and (d-f) the corresponding pore size distribution of the Fe- $N_x$ -CNFs, the  $N_x$ -CNFs and the CNFs.

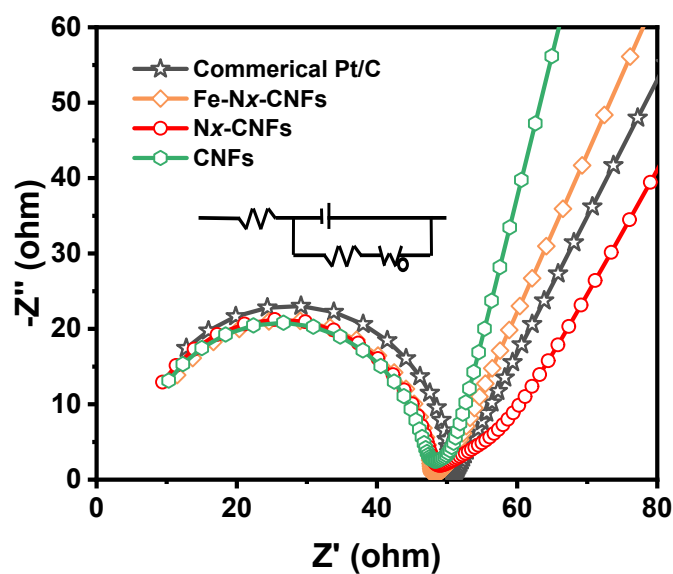

Fig. S3. EIS (Nyquist plots) of commercial Pt/C, Fe-Nx-CNFs, Nx-CNFs and CNFs samples.

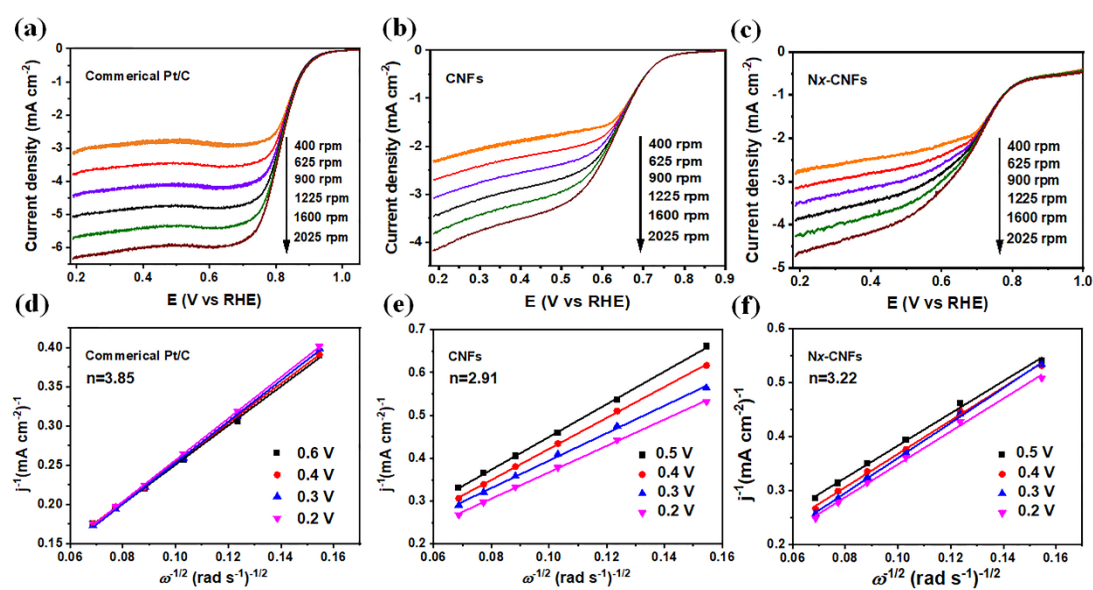

Fig. S4. Voltammograms of (a) commercial Pt/C; (b) CNFs; (c) Nx-CNFs at various speeds at a scan rate of  $10 \text{ mV s}^{-1}$ ; and (d-f) are the corresponding K-L plots at different potentials.

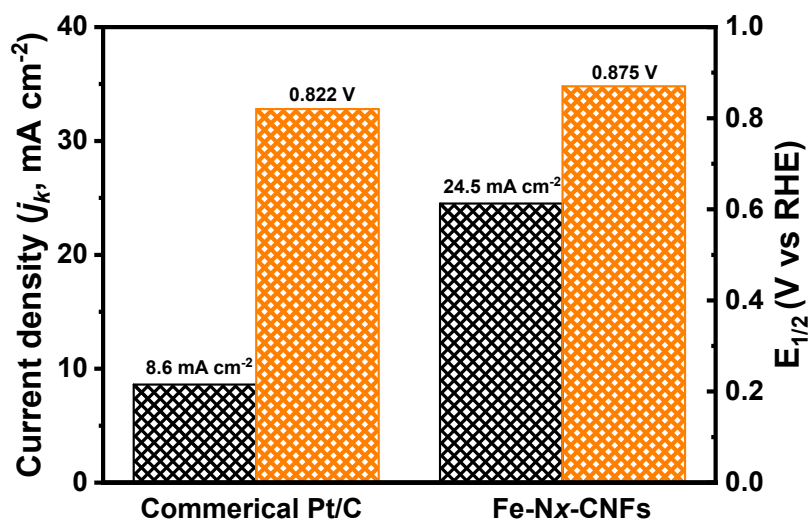

Fig. S5. The kinetic current densities ( $J_k$ ) at 0.8 V and  $E_{1/2}$  of the commercial Pt/C and the Fe-Nx-CNFs.

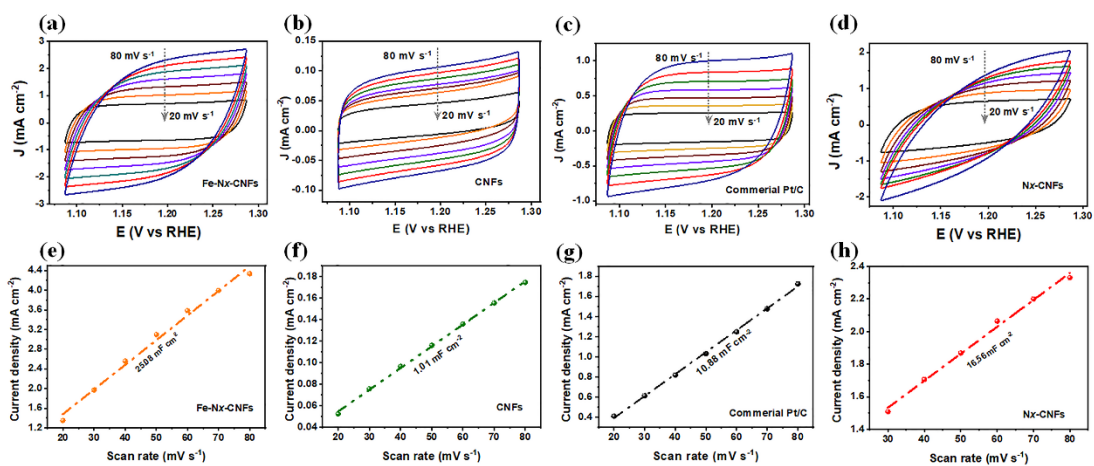

Fig. S6. The CV curves at different scan rates ( $20\text{-}80\text{ mV s}^{-1}$ ), in  $\text{N}_2$ -Saturated  $0.1\text{M}$  KOH and corresponding  $C_{dl}$  of the samples.

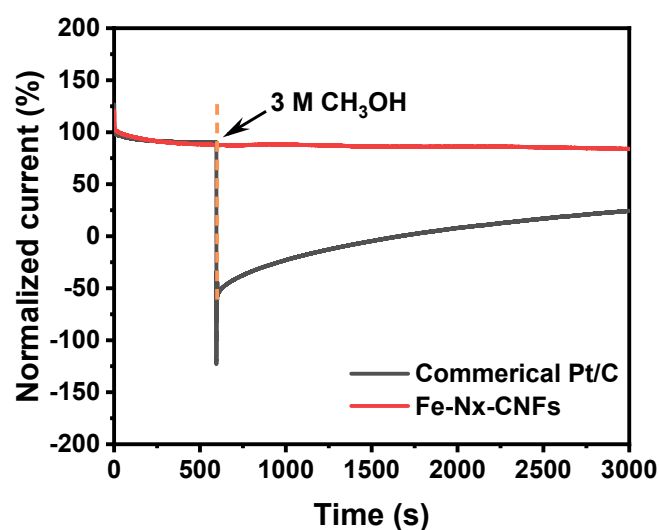

Fig. S7. Methanol resistance test of the Fe-N<sub>x</sub>-CNFs and the commercial Pt/C.

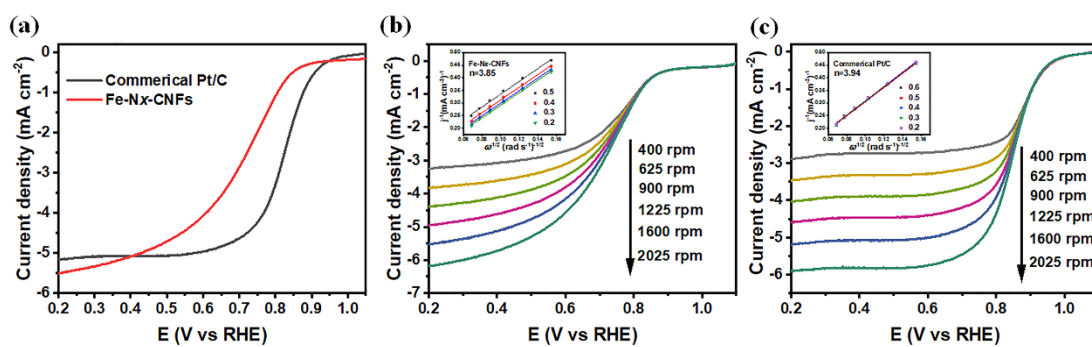

Fig. S8. (a) ORR polarization curves of the Fe-N<sub>x</sub>-CNFs and the commercial Pt/C in oxygen saturated 0.1 M HClO<sub>4</sub> at a rotating rate of 1600 rpm. LSV curves of (b) Fe-N<sub>x</sub>-CNFs and (c) commercial Pt/C at different rotating rates in oxygen saturated 0.1 M HClO<sub>4</sub> and the corresponding K-L plots and the calculated electron transfer (inset).

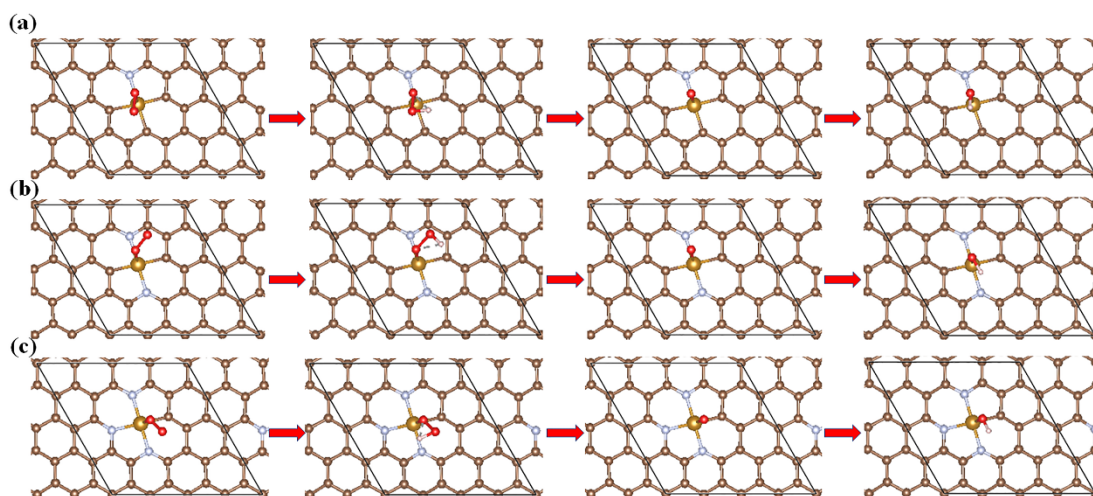

Fig. S9. ORR mechanisms over (a) FeN<sub>1</sub>; (b) FeN<sub>2</sub>; and (c) FeN<sub>3</sub> active site. The central atom is Fe; brown, silver, red and white balls represent the C, N, O and H

atom, respectively.

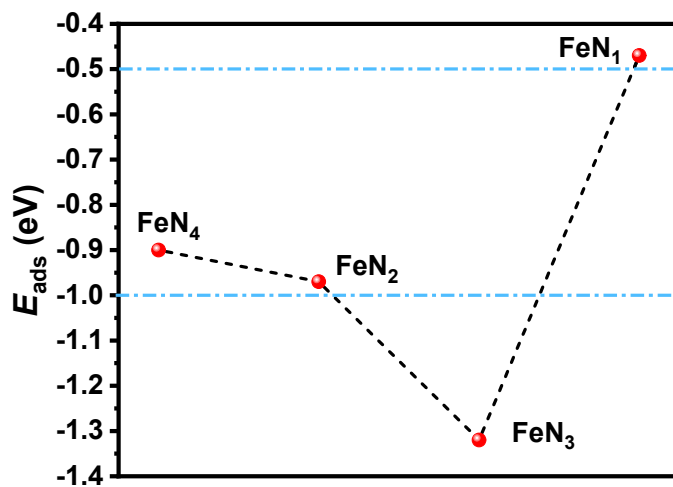

Fig. S10. The adsorption energy of  $\text{FeN}_{1-4}$ .

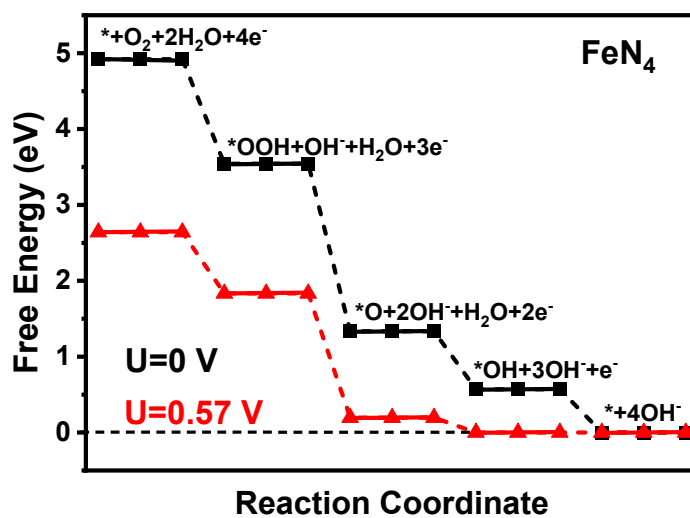

Fig. S11. Free-energy diagrams for ORR pathways in an alkaline medium on  $\text{FeN}_4$  at  $U=0$  V and  $U=0.57$  V.

Table S1. Content of C, N and Fe measured by XPS analysis.

| Element | Content (wt %) |
|---------|----------------|
| C       | 92.89          |
| N       | 5.14           |
| Fe      | 1.96           |

Table S2. Comparison of ORR electrochemical performance of Fe-N<sub>x</sub>-CNFs with recently reported Fe-based ORR electrocatalysts in basic electrolyte (0.1 M KOH)

| Catalysts                                 | Diffusion limited current density (mA cm <sup>-2</sup> )/Pt-C | Half-wave potential (V vs. RHE)/Pt-C | References       |
|-------------------------------------------|---------------------------------------------------------------|--------------------------------------|------------------|
| <b>Fe-N<sub>x</sub>-CNFs</b>              | <b>6.08/5.31</b>                                              | <b>0.875/0.822</b>                   | <b>This work</b> |
| Fe-N <sub>x</sub> /HPC                    | 5.0/5.0                                                       | 0.88/0.84                            | [1]              |
| Fe@N-doped graphene                       | ~6.34/~5.82                                                   | 0.85/0.85                            | [2]              |
| Fe-N-C-900-control                        | ~5.64/~5.3                                                    | 0.905/0.872                          | [3]              |
| Ni-N <sub>4</sub> /GHSs/Fe-N <sub>4</sub> | 6.0/5.79                                                      | 0.83/0.86                            | [4]              |
| Fe/Ni-N-C                                 | 5.76/5.13                                                     | 0.861/0.83                           | [5]              |
| Fe/Mn-N <sub>x</sub> -C                   | 5.7/5.3                                                       | 0.88/0.85                            | [6]              |
| Fe-ISAs/CN                                | ~6.2/~6.3                                                     | 0.90/~0.85                           | [7]              |
| SA-Fe-HPC                                 | 5.4/5.0                                                       | 0.89/0.84                            | [8]              |
| Fe/OES                                    |                                                               | 0.85/0.85                            | [9]              |
| Ce/Fe-NCNW                                | ~5.64/~5.68                                                   | 0.915/0.866                          | [10]             |
| M-Fe-NCNS                                 | ~4.3/~4.1                                                     | 0.88/0.82                            | [11]             |
| Fe SAs-N/C-20                             | ~6.16/~5.33                                                   | 0.909/0.85                           | [12]             |
| S,N-Fe/N/C-CNT                            | 6.68/~5.6                                                     | 0.85/0.82                            | [13]             |
| Fe SAs/N-C                                | 5.75/5.56                                                     | 0.91/0.842                           | [14]             |
| Fe-SAs/NPS-HC                             | 5.95/6.1                                                      | 0.912/0.84                           | [15]             |
| Fe-SAs/NSC                                | 6/5.41                                                        | 0.87/0.86                            | [16]             |
| AC@f-FeCoNC900                            | ~5.75/~5.5                                                    | 0.89/0.84                            | [17]             |
| Fe-N-CNTs-12                              | 6.18/5.726                                                    | 0.89/0.841                           | [18]             |
| UNT Co SAs/N-C                            | ~5.1/~4.7                                                     | ~0.89/~0.88                          | [19]             |
| Fe@N-C-12                                 | ~5.9/~6.3                                                     | 20 mV positive than Pt/C             | [20]             |
| Fe-NCCs                                   | ~6.3/~6                                                       | 0.82/0.84                            | [21]             |
| Fe-N-C/rGO                                | ~5.9/~6.1                                                     | 0.81/0.82                            | [22]             |
| Fe-ISAs@CN                                |                                                               | 0.854/0.842                          | [23]             |
| Fe1-N-CNFs                                | ~4.8/4.5                                                      | 0.84/0.79                            | [24]             |

#### References

- 1 Z.P. Zhang, X.J. Gao, M.L. Dou, J. Ji, F. Wang, Fe-N<sub>x</sub> moiety-modified hierarchically porous carbons derived from porphyra for highly effective oxygen reduction reaction, *J. Mater. Chem. A*, 2017, **5**, 1526–1532.
- 2 D. Liu, C. Wu, S. Chen, S. Ding, Y. Xie, C. Wang, T. Wang, Y.A. Haleem, Z.u. Rehman, Y. Sang, Q. Liu, X. Zheng, Y. Wang, B. Ge, H. Xu, L. Song. *In situ* trapped high-density single metal atoms within graphene: Iron-containing hybrids as representatives for efficient oxygen reduction, *Nano Res.*, 2018, **11(4)**, 2217–2228.
- 3 C. Zhu, Q. Shi, B.Z. Xu, S. Fu, G. Wan, C. Yang, S. Yao, J. Song, H. Zhou, D. Du, S.P. Beckman, D. Su, Y. Lin, Hierarchically Porous M-N-C (M = Co and Fe) Single-Atom Electrocatalysts with Robust MN<sub>x</sub> Active Moieties Enable Enhanced ORR Performance, *Adv. Energy Mater.*, 2018, 1801956.

- 4 J. Chen, H. Li, C. Fan, Q. Meng, Y. Tang, X. Qiu, G. Fu, T. Ma, Dual Single-Atomic Ni-N<sub>4</sub> and Fe-N<sub>4</sub> Sites Constructing Janus Hollow Graphene for Selective Oxygen Electrocatalysis, *Adv. Mater.*, 2020, 2003134.
- 5 H. Li, J. Wang, R. Qi, Y. Hu, J. Zhang, H. Zhao, J. Zhang, Y. Zhao, Enhanced Fe 3d delocalization and moderate spin polarization in Fe–Ni atomic pairs for bifunctional ORR and OER electrocatalysis, *Appl. Catal. B- Environ.*, 2021, **285**, 119778.
- 6 Z. Chen, X. Liao, C. Sun, K. Zhao, D. Ye, J. Li, G. Wu, J. Fang, H. Zhao, J. Zhang, Enhanced performance of atomically dispersed dual-site Fe-Mn electrocatalysts through cascade reaction mechanism, *Appl. Catal. B- Environ.*, 2021, **288**, 120021.
- 7 Y. Chen, S. Ji, Y. Wang, J. Dong, W. Chen, Z. Li, R. Shen, L. Zheng, Z. Zhuang, D. Wang, Y. Li, Isolated Single Iron Atoms Anchored on N-Doped Porous Carbon as an Efficient Electrocatalyst for the Oxygen Reduction Reaction, *Angew. Chem. Int. Ed.*, 2017, **56(24)**, 6937-6941.
- 8 Z. Zhang, J. Sun, F. Wang, L. Dai, Efficient Oxygen Reduction Reaction (ORR) Catalysts Based on Single Iron Atoms Dispersed on a Hierarchically Structured Porous Carbon Framework, *Angew. Chem.*, 2018, **130**, 9176–9181.
- 9 C.-C. Hou, L. Zou, L. Sun, K. Zhang, Z. Liu, Y. Li, C. Li, R. Zou, J. Yu, Q. Xu, Single-Atom Iron Catalysts on Overhang-Eave Carbon Cages for High-Performance Oxygen Reduction Reaction, *Angew. Chem. Int. Ed.* 2020, **59**, 7384-7389.
- 10 J.C. Li, S. Maurya, Y.S. Kim, T. Li, L. Wang, Q. Shi, D. Liu, S. Feng, Y. Lin, M. Shao, Stabilizing Single-Atom Iron Electrocatalysts for Oxygen Reduction via Ceria Confining and Trapping, *Acs Catal.*, 2020, **10(4)**, 2452-2458.
- 11 M. Wang, H. Ji, S. Liu, H. Sun, J. Liu, C. Yan, T. Qian, Single-atom scale metal vacancy engineering in heteroatom-doped carbon for rechargeable zinc-air battery with reduced overpotential, *Chem. Eng. J.*, 2020, **393**, 124702.
- 12 R. Jiang, L. Li, T. Sheng, G. Hu, Y. Chen, L. Wang, Edge-Site Engineering of Atomically Dispersed Fe-N<sub>4</sub> by Selective C-N Bond Cleavage for Enhanced ORR Activities, *J. Am. Chem. Soc.*, 2018, **140**, 11594–11598.
- 13 P. Chen, T. Zhou, L. Xing, K. Xu, Y. Tong, H. Xie, L. Zhang, W. Yan, W. Chu, C. Wu, Y. Xie, Atomically Dispersed Iron–Nitrogen Species as Electrocatalysts for Bifunctional Oxygen Evolution and Reduction Reactions, *Angew. Chem. Int. Ed.*, 2017, **56**, 610–614.
- 14 Z. Yang, Y. Wang, M. Zhu, Z. Li, W. Chen, W. Wei, T. Yuan, Y. Qu, Q. Xu, C. Zhao, X. Wang, P. Li, Y. Li, Y. Wu, Y. Li, Boosting Oxygen Reduction Catalysis with Fe–N<sub>4</sub> Sites Decorated Porous Carbons toward Fuel Cells, *ACS Catal.*, 2019, **9**, 2158–2163.
- 15 Y. Chen, S. Ji, S. Zhao, W. Chen, J. Dong, W.-C. Cheong, R. Shen, X. Wen, L. Zheng, A.I. Rykov, S. Cai, H. Tang, Z. Zhuang, C. Chen, Q. Peng, D. Wang, Y. Li, Enhanced oxygen reduction with single-atomic-site iron catalysts for a zinc-air battery and hydrogen-air fuel cell, *Nature Commun.*, 2018, **9**, 5422.
- 16 J. Zhang, Y. Zhao, C. Chen, Y.C. Huang, C.L. Dong, C.J. Chen, R.S. Liu, C. Wang, K. Yan, Y. Li, G. Wang, Tuning the Coordination Environment in Single-Atom Catalysts to Achieve Highly Efficient Oxygen Reduction Reactions, *J. Am. Chem. Soc.*, 2019, **141(51)**, 20118-20126.
- 17 G. Zhang, Y. Jia, C. Zhang, X. Xiong, K. Sun, R. Chen, W. Chen, Y. Kuang, L. Zheng, H. Tang, W. Liu, J. Liu, X. Sun, W.-F. Lin, H. Dai, A general route via for mamide condensation to prepare atomically dispersed metal–nitrogen–carbon electrocatalysts for energy technologies,



*Energy Environ. Sci.*, 2019, **12**, 1317-1325.

18 Z. Zhang, H. Jin, J. Zhu, W. Li, C. Zhang, J. Zhao, F. Luo, Z. Sun, S. Mu, 3D flower-like ZnFe-ZIF derived hierarchical Fe, N-Co doped carbon architecture for enhanced oxygen reduction in both alkaline and acidic media, and zinc-air battery performance, *Carbon*, 2020, **161**, 502-509.

19 X. Sun, S. Sun, S. Gu, Z. Liang, J. Zhang, Y. Yang, Z. Deng, P. Wei, J. Peng, Y. Xu, C. Fang, Q. Li, J. Han, Z. Jiang, Y. Huang, High-performance single atom bifunctional oxygen catalysts derived from ZIF-67 superstructures, *Nano Energy*, 2019, **61**, 245-250.

20 Y. Ye, H. Li, F. Cai, C. Yan, R. Si, S. Miao, Y. Li, G. Wang, X. Bao, Two-Dimensional Mesoporous Carbon Doped with Fe-N Active Sites for Efficient Oxygen Reduction, *ACS Catal.*, 2017, **7**, 7638-7646.

21 N. Jia, Q. Xu, F. Zhao, H.-Xu Gao, J. Song, P. Chen, Z. An, X. Chen, Y. Chen, Fe/N Codoped Carbon Nanocages with Single-Atom Feature as Efficient Oxygen Reduction Reaction Electrocatalyst, *ACS Appl. Energy Mater.*, 2018, **1**, 4982-4990.

22 C. Zhang, J. Liu, Y. Ye, Z. Aslam, R. Brydson, C. Liang, Fe-N-Doped Mesoporous Carbon with Dual Active Sites Loaded on Reduced Graphene Oxides for Efficient Oxygen Reduction Catalysts, *ACS Appl. Mater. Interfaces*, 2018, **10**, 2423-2429.

23 W. Yang, P. Hong, D. Yang, Y. Yang, Z. Wu, C. Xie, J. He, K. Zhang, L. Kong, J. Liu, Enhanced Fenton-like degradation of sulfadiazine by single atom iron materials fixed on nitrogen-doped porous carbon, *J. Colloid Interf. Sci.*, 2021, **597**, 56-65.

24 L. Dong, J. Zang, W. Wang, X. Liu, Y. Zhang, J. Su, Y. Wang, X. Han, J. Li, Electrospun single iron atoms dispersed carbon nanofibers as high performance electrocatalysts toward oxygen reduction reaction in acid and alkaline media, *J. Colloid Interf. Sci.*, 2020, **564**, 134-142.
